# Supplementary material for: An Antigen-Presenting and Apoptosis-Inducing Polymer Microparticle Prolongs Alloskin Graft Survival by Selectively and Markedly Depleting Alloreactive CD8+ T Cells
Source: PubMed Central journal article supplement (PMC5465244; doi:10.3389/fimmu.2017.00657), 2017-06-09
Supplement: image_1.pdf [file image_1.pdf]

**Supplementary Figure 1:**

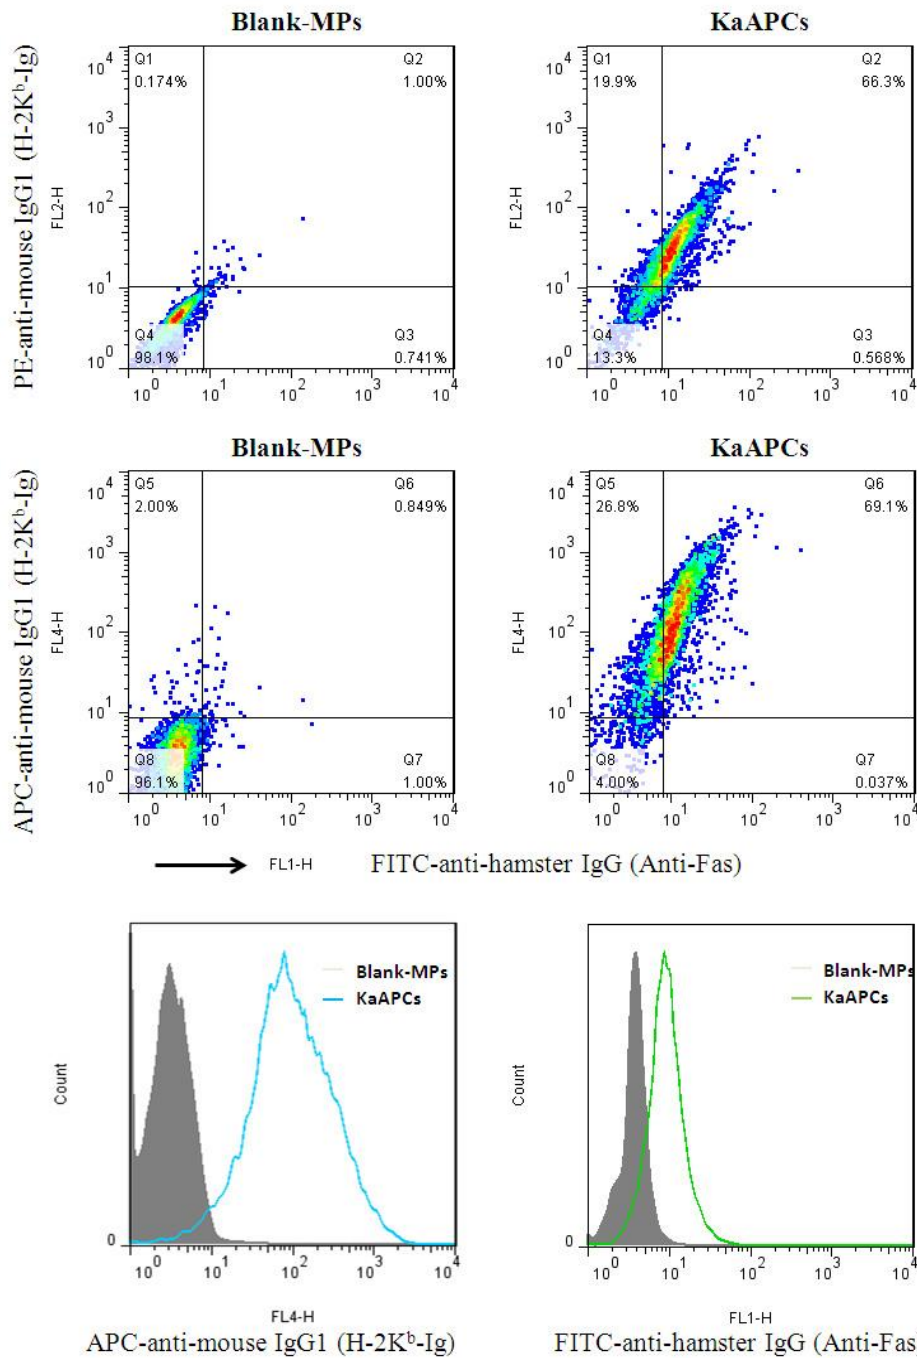

**Fig. S1** Phenotypic analyses of KaAPCs. KaAPCs and Blank-MPs (PLGA-MPs blocked with BSA) were stained by PE- or APC-anti-mouse IgG1 (binds to the Ig fragment of H-2K<sup>b</sup>-Ig dimer) and FITC-anti-hamster IgG (binds to anti-Fas) mAbs and followed by flow cytometry. The representative dot plots or diagrams were presented.
