# Supplementary material for: An Antigen-Presenting and Apoptosis-Inducing Polymer Microparticle Prolongs Alloskin Graft Survival by Selectively and Markedly Depleting Alloreactive CD8+ T Cells
Source: PubMed Central journal article supplement (PMC5465244; doi:10.3389/fimmu.2017.00657), 2017-06-09
Supplement: image_3.pdf [file image_3.pdf]

**Supplementary Figure 3:**

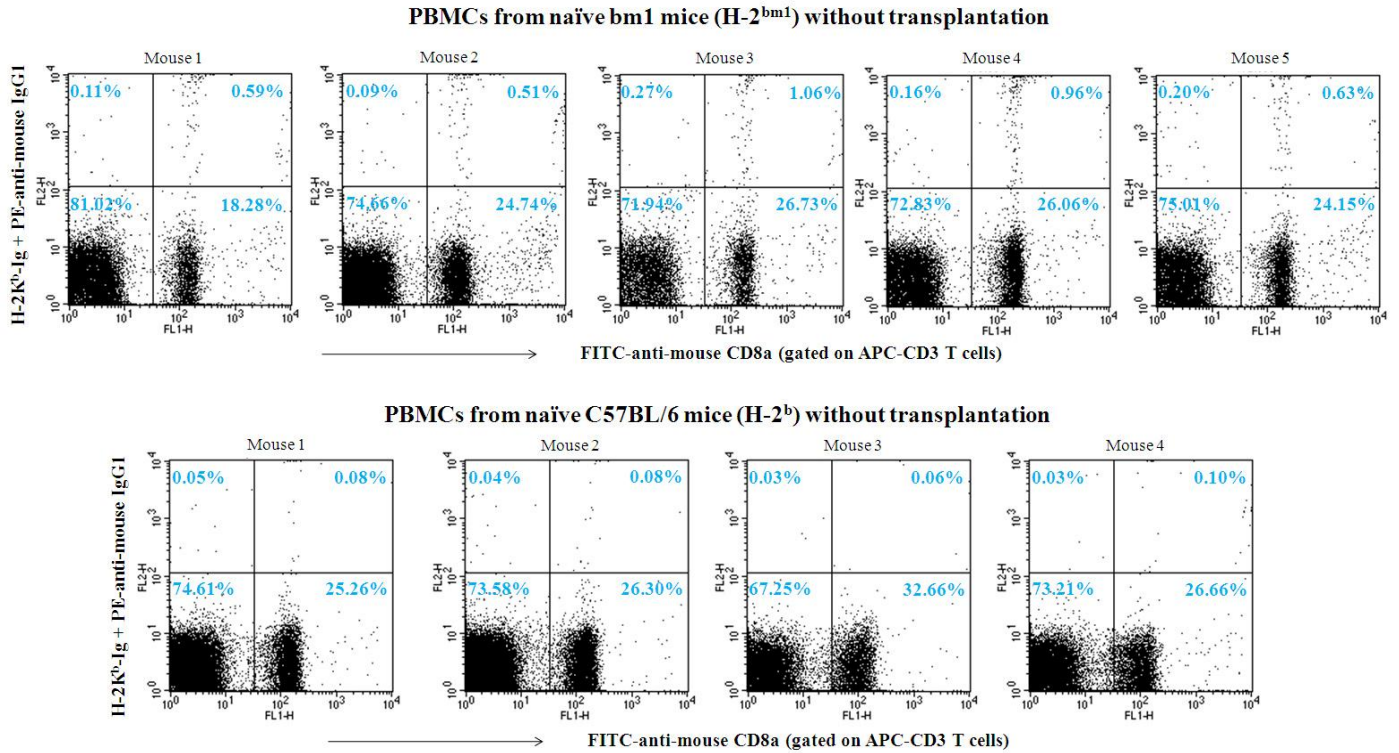

**Fig. S3** Percentage of H-2K<sup>b</sup>-alloreactive CD8<sup>+</sup> T cells and CD4<sup>+</sup> T cells in the PBMCs of naïve bm1 mice without transplantation. Before transplantation, the PBMCs of naïve bm1 mice were harvested and stained with H-2K<sup>b</sup>-Ig dimer (peptide unloaded), APC-anti-mouse CD3 and FITC-anti-mouse CD8a to detect the frequency of H-2K<sup>b</sup>-alloreactive T cells, and followed by flow cytometric analysis of Dimer<sup>+</sup>/CD8<sup>+</sup>/CD3<sup>+</sup> cells and Dimer<sup>+</sup>/CD8<sup>-</sup>/CD3<sup>+</sup> cells. As shown in the dot plots, H-2K<sup>b</sup>-Ig dimer mainly stained with CD8<sup>+</sup> T cells with a percentage of  $0.75 \pm 0.24\%$  in CD3<sup>+</sup> T cell population or  $3.01 \pm 0.73\%$  in CD8<sup>+</sup> T cell population, and very weak staining with CD4<sup>+</sup> T cells (CD8<sup>-</sup>/CD3<sup>+</sup>) was found ( $0.16 \pm 0.07\%$  in CD3<sup>+</sup> T cell population). As a negative control of H-2K<sup>b</sup>-Ig dimer staining, PBMCs from naïve C57BL/6 mice (H-2<sup>b</sup>) were also stained by H-2K<sup>b</sup>-Ig dimer, but only background staining was found with CD8<sup>+</sup> T cells.
