# Supplementary material for: An Antigen-Presenting and Apoptosis-Inducing Polymer Microparticle Prolongs Alloskin Graft Survival by Selectively and Markedly Depleting Alloreactive CD8+ T Cells
Source: PubMed Central journal article supplement (PMC5465244; doi:10.3389/fimmu.2017.00657), 2017-06-09
Supplement: image_13.pdf [file image_13.pdf]

Supplementary Figure 13:

**A** **Kidney sections**

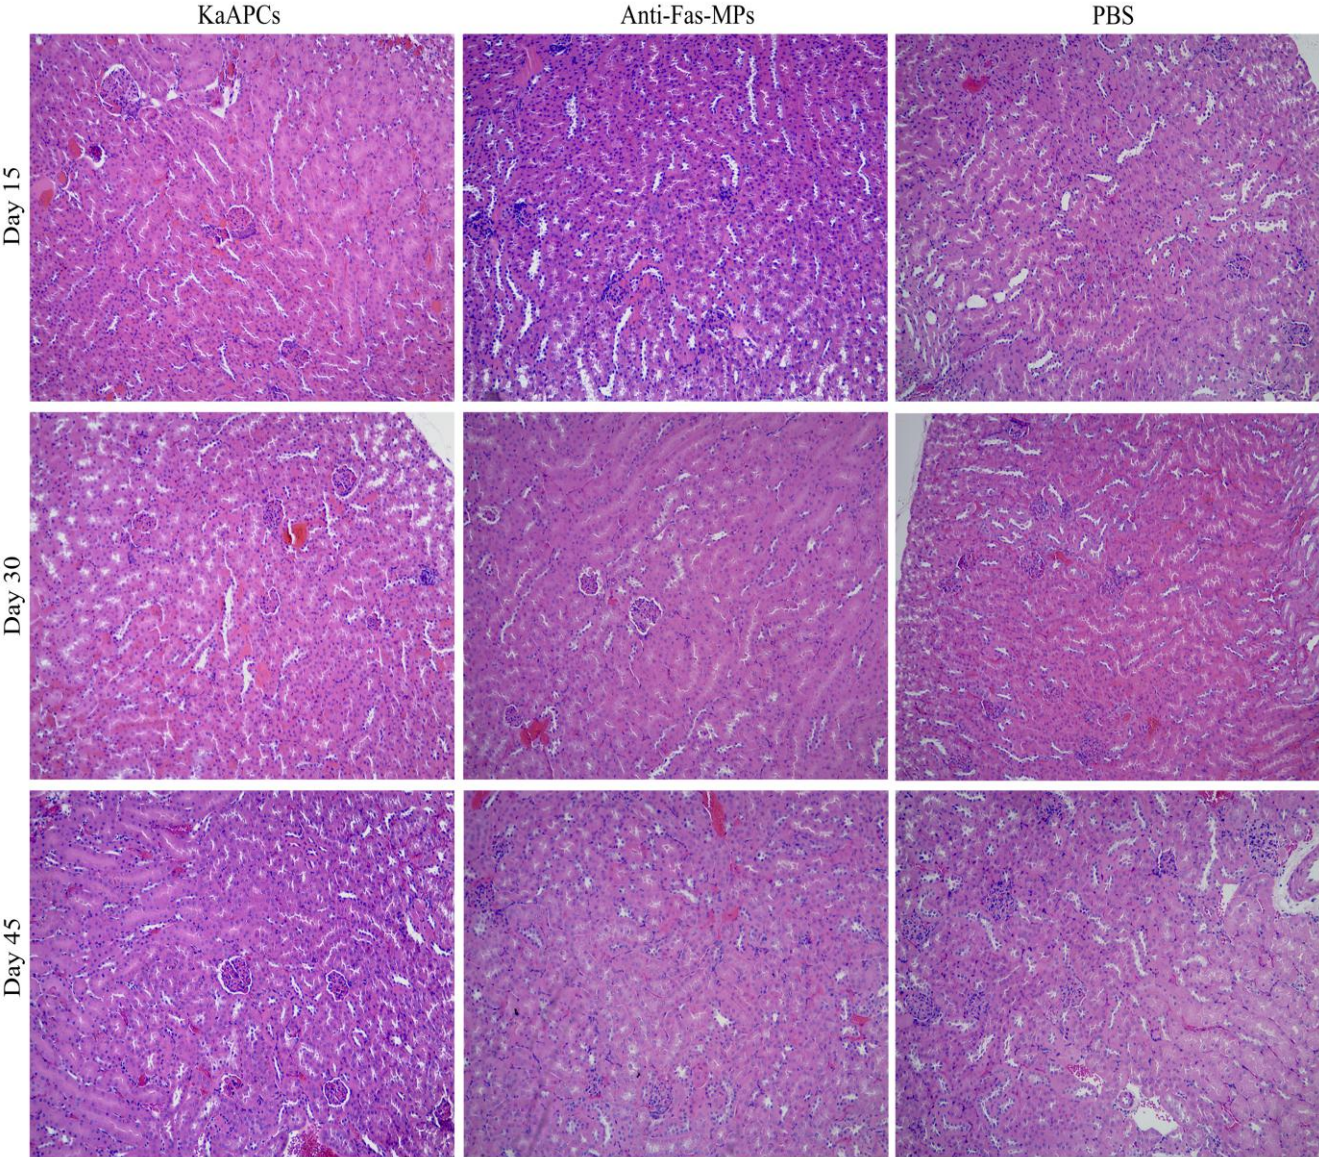

**B**

**Heart sections**

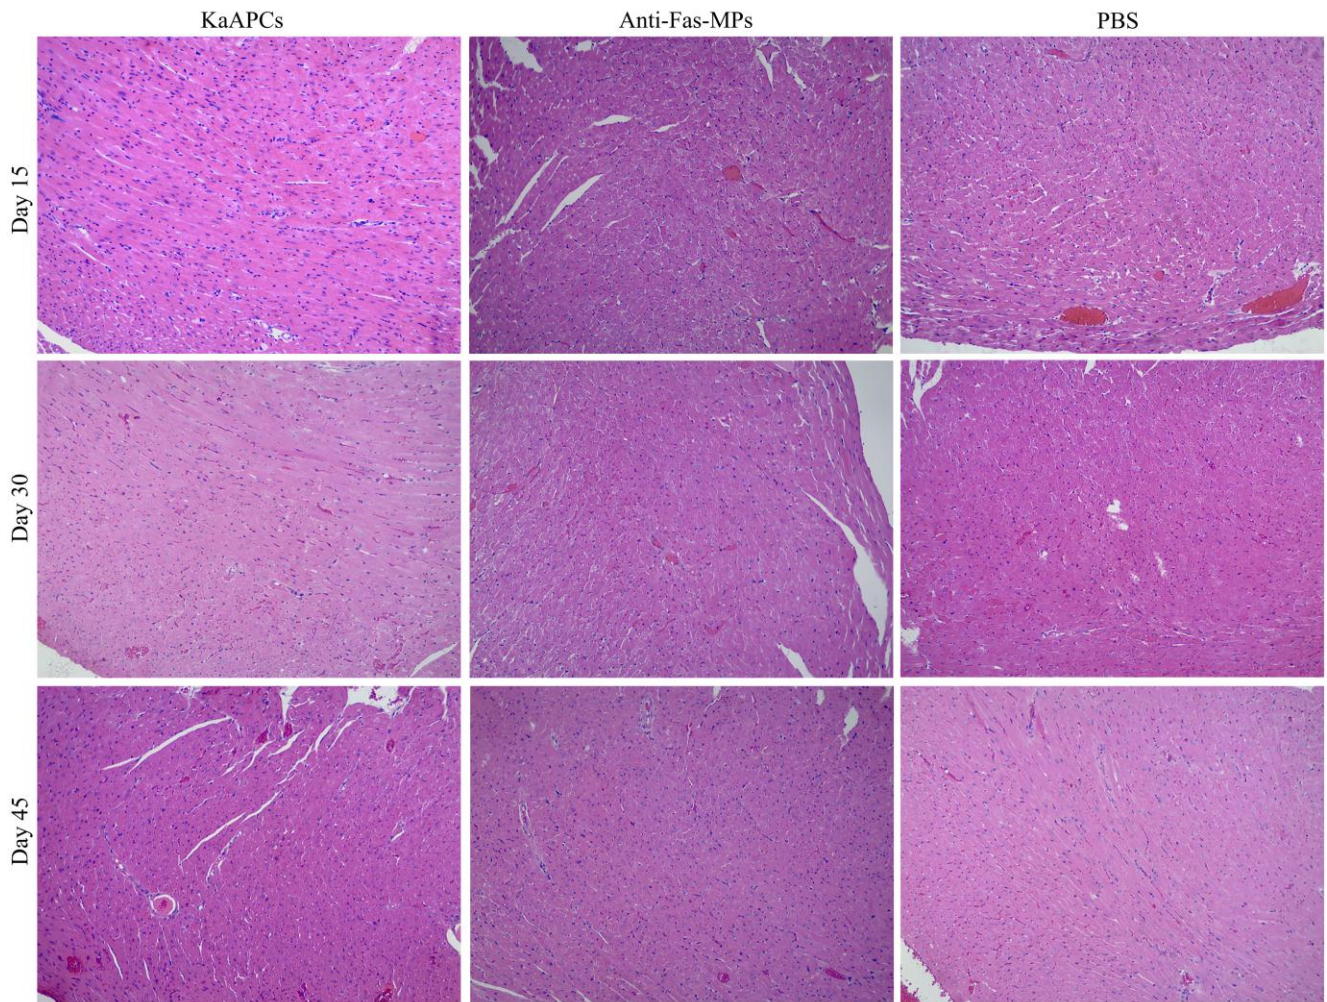

**C****Lung sections**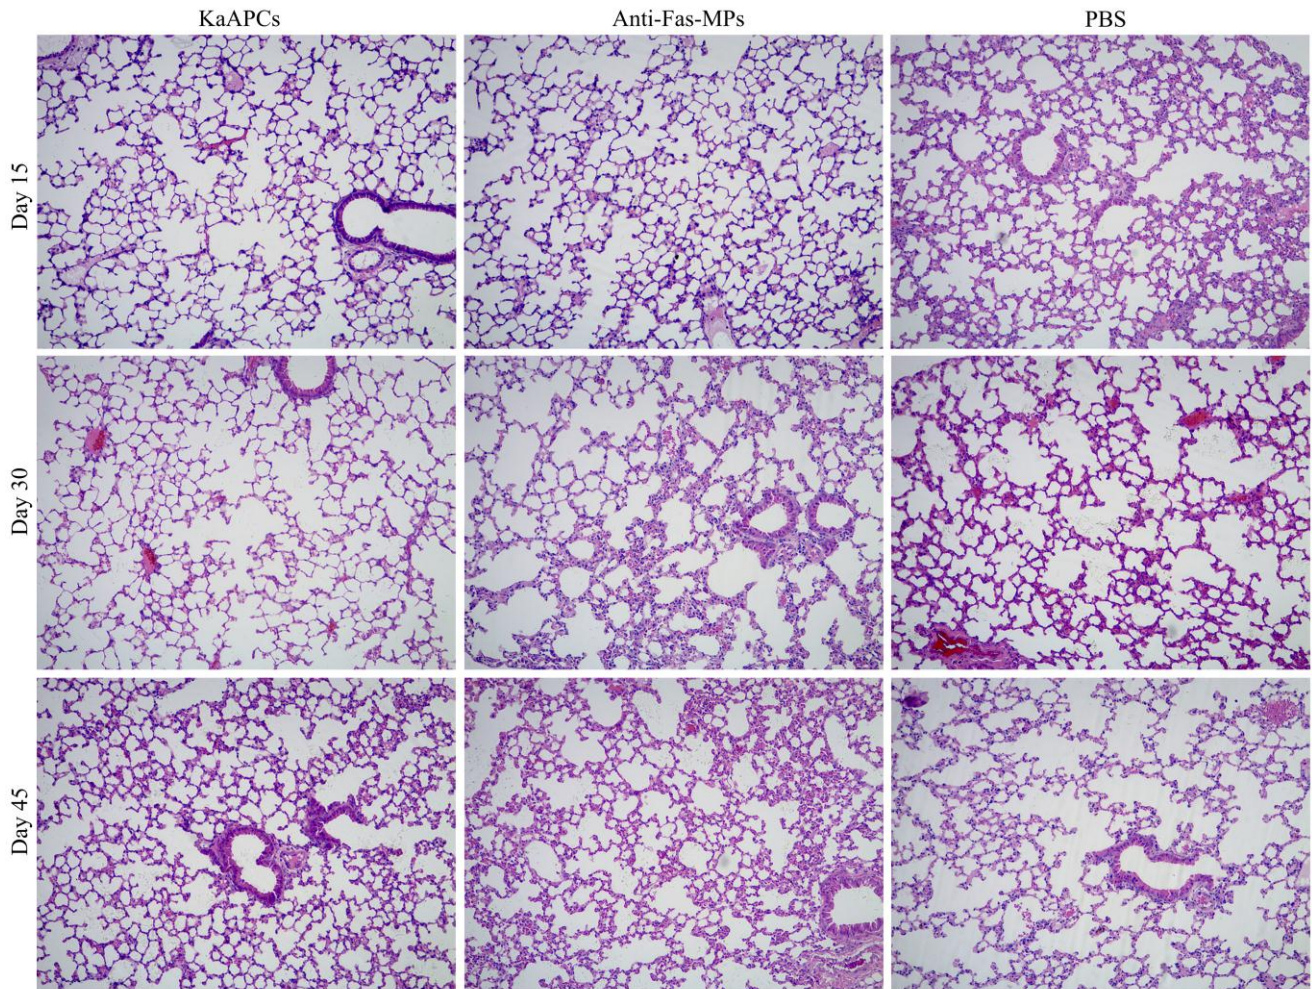

**Fig. S13** KaAPCs do not cause visible pathological injuries in kidney, heart, and lung. After treatment with KaAPCs, anti-Fas-MPs or PBS as described, the pathological injuries were analyzed for various organs on days 15, 30, and 45 after transplantation by H&E staining. Representative staining results of kidney sections (A), heart sections (B), and lung sections (C) from each treatment group at each time point were presented.  $n = 3$  mice for each group at each time point.
